# Supplementary material for: The use of vibrational spectroscopy techniques as a tool for the discrimination and identification of the natural and synthetic organic compounds used in conservation
Source: Royal Society of Chemistry journal article supplement (doi:10.1039/c6ay02645a), 2016-01-01

### S1: Infrared and Raman spectra (1064nm) of polyvinyl alcohol and acetate

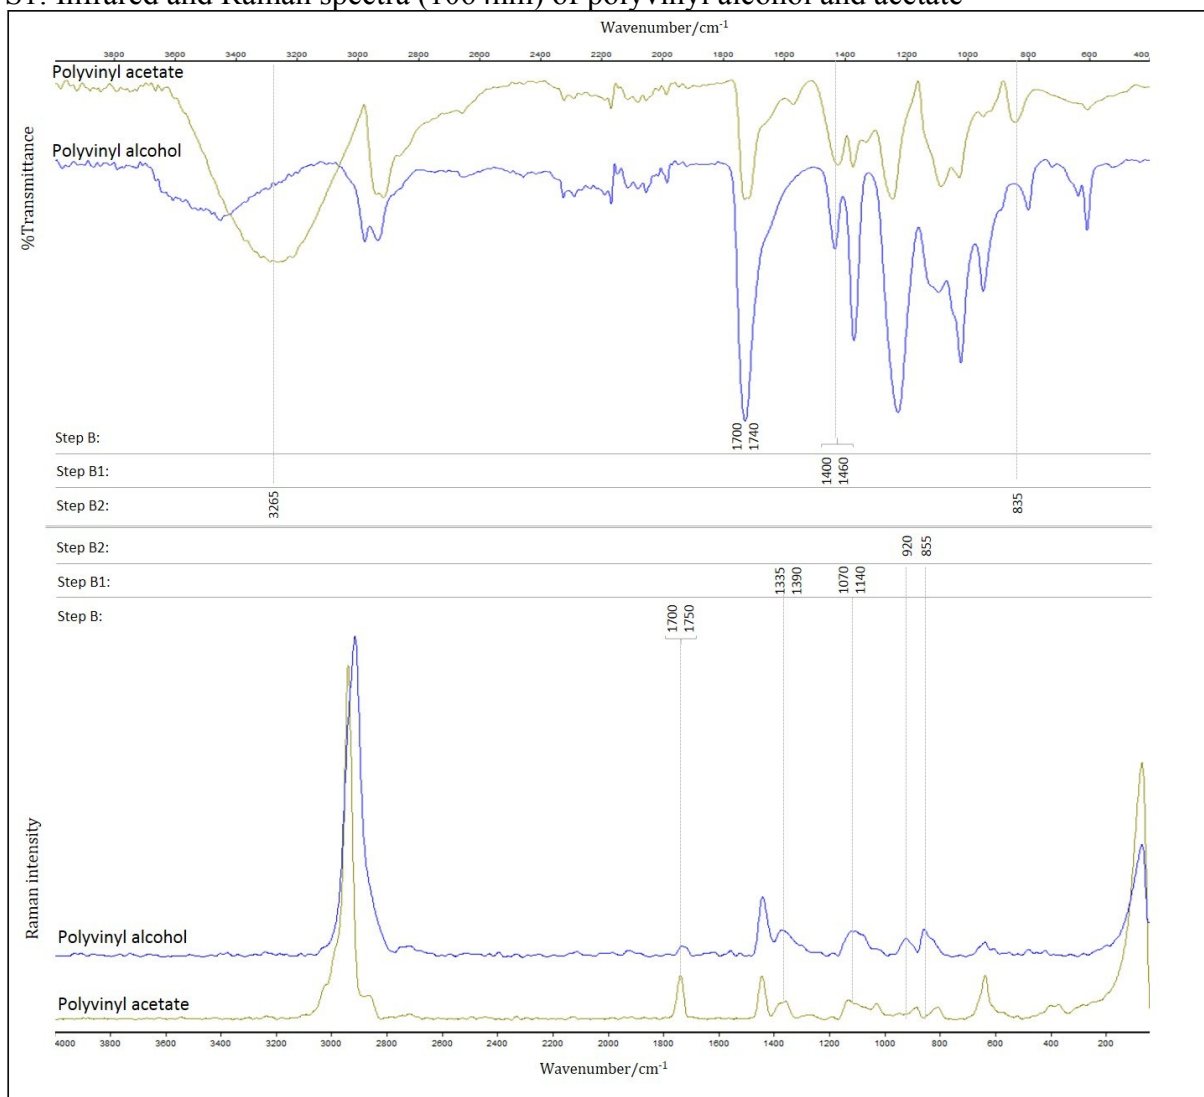

## S2: Infrared and Raman spectra (1064nm) of polyester and acrylic products

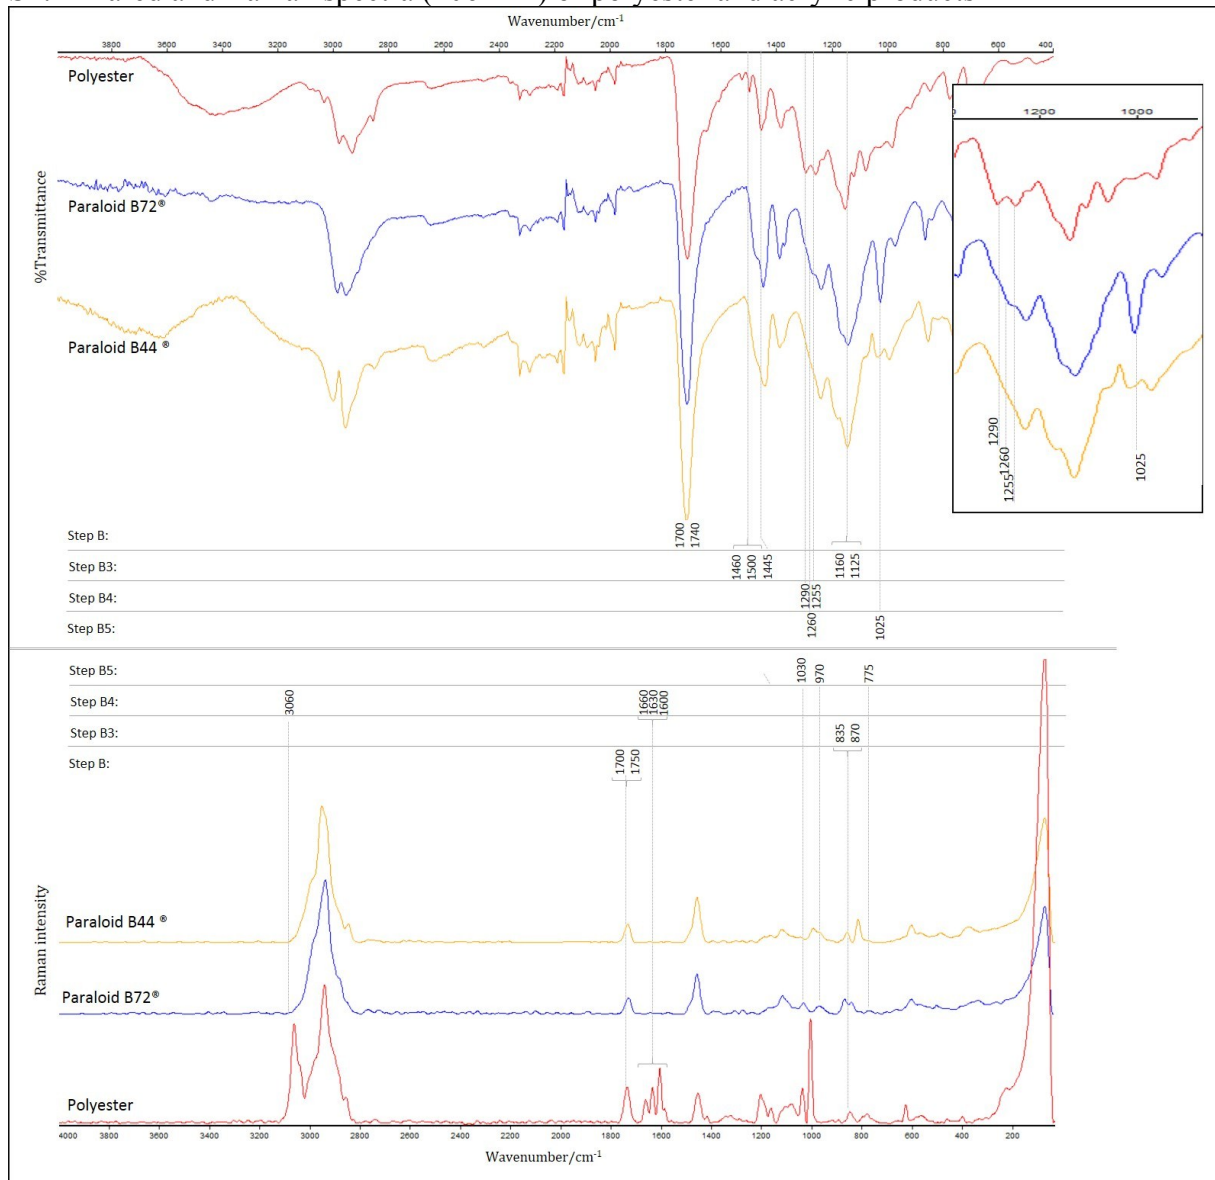

S3: Infrared and Raman spectra (1064nm) of oil and resin

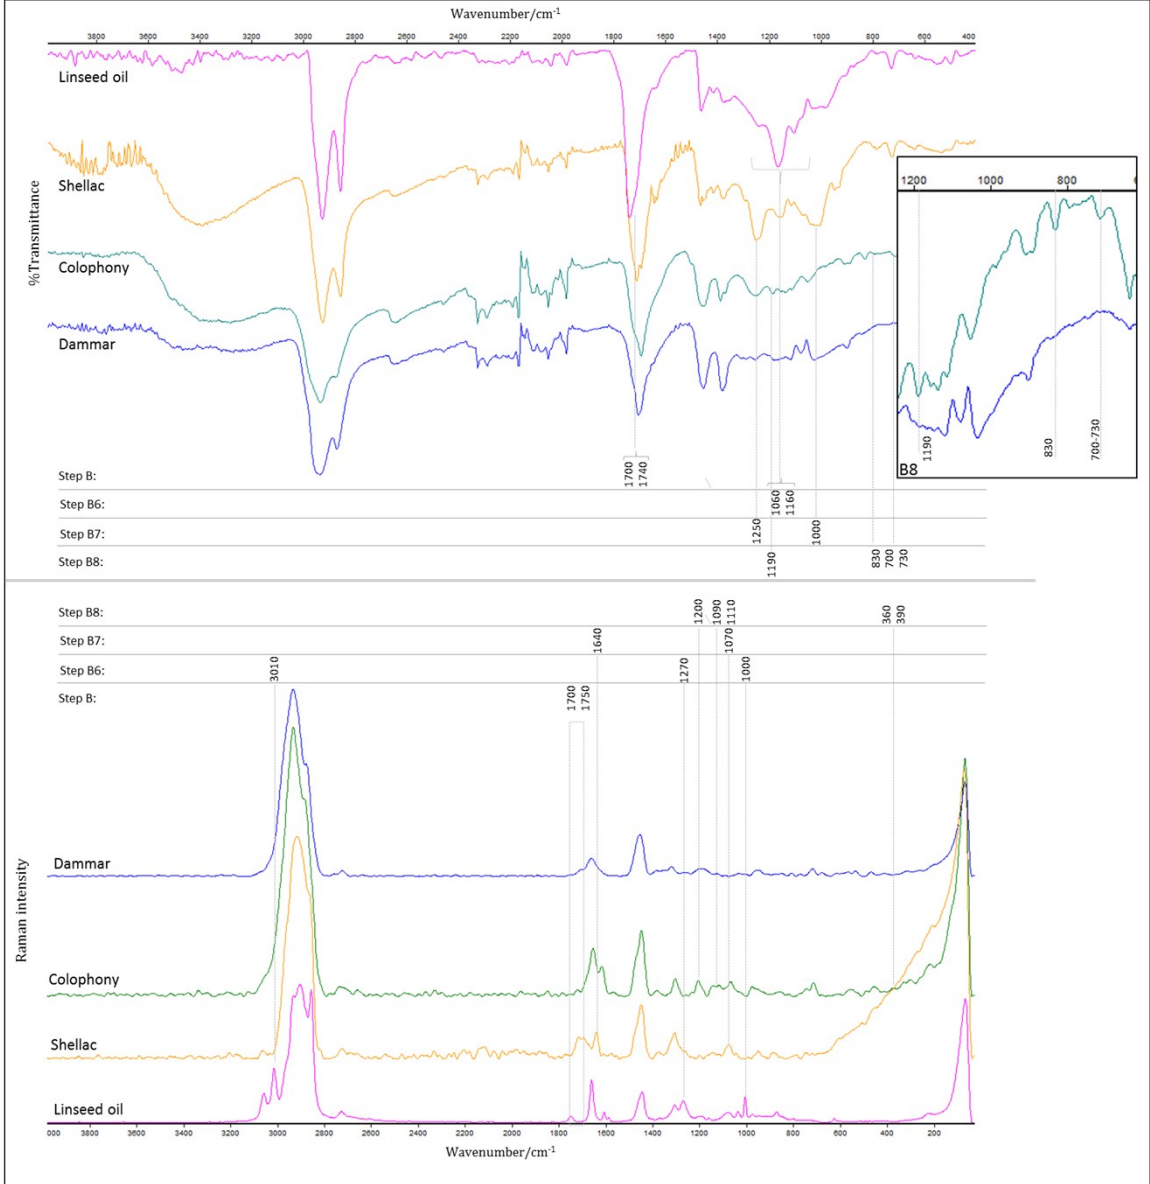

S4: Infrared and Raman spectra (1064nm) of *Araldite 2020*<sup>®</sup>, *Mowital B60*<sup>®</sup> and arabic gum

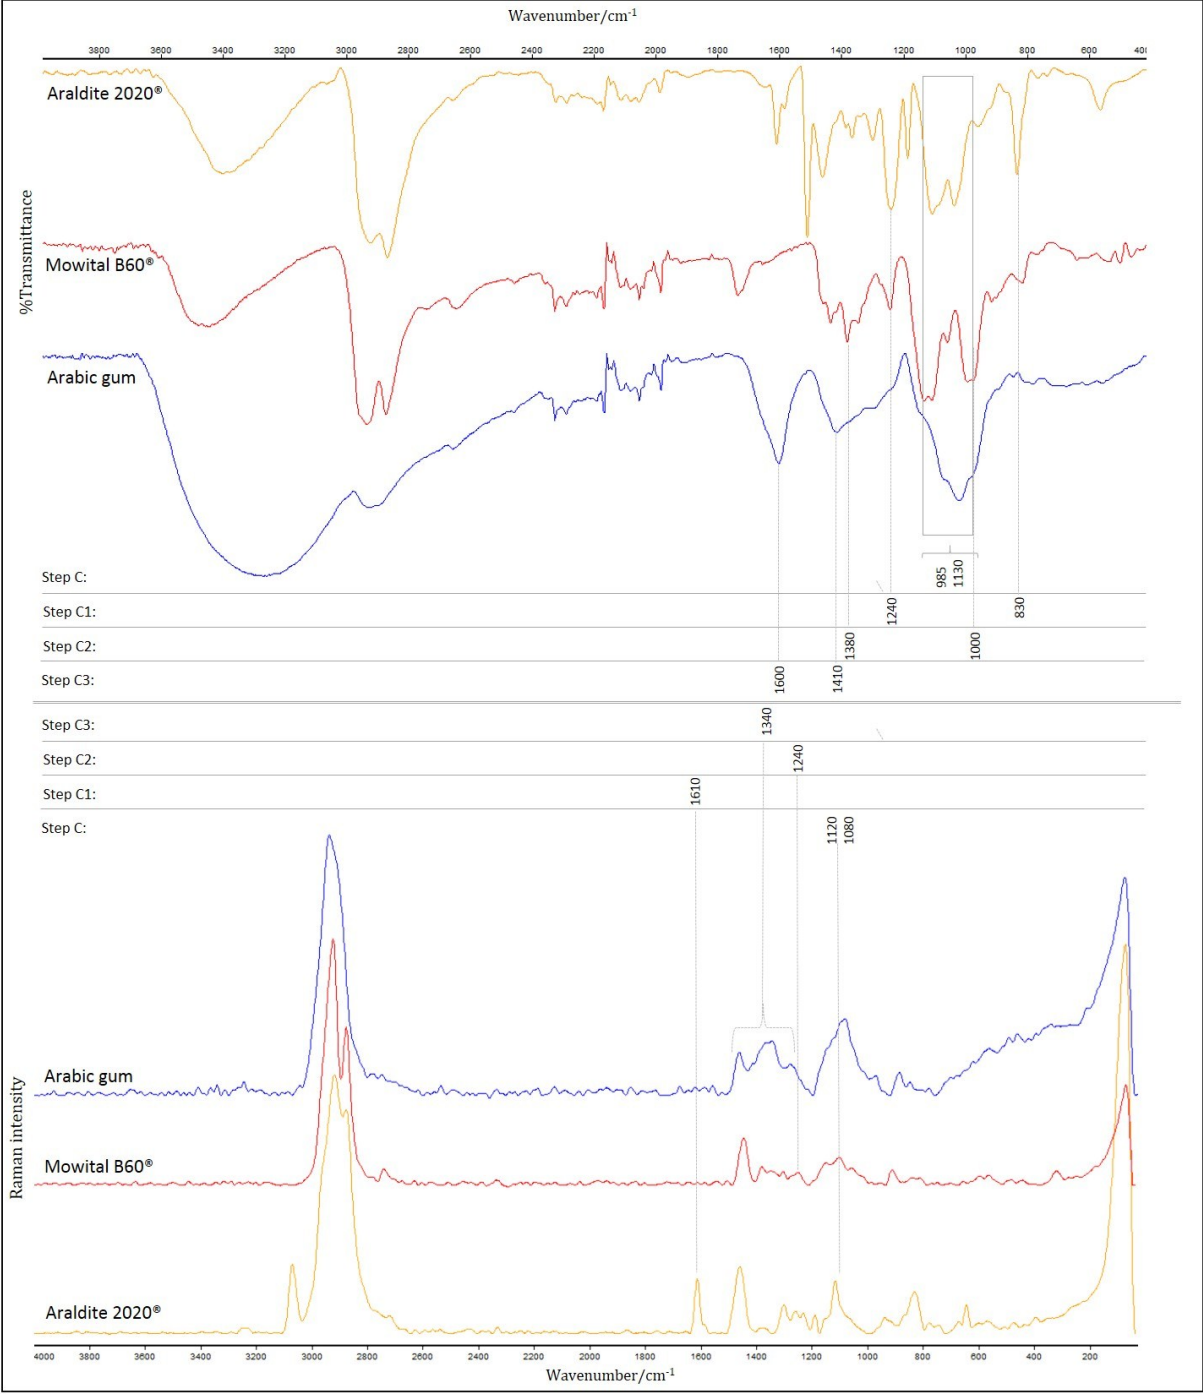

S5: Infrared and Raman spectra (1064nm) of *Uhu Hart*<sup>®</sup>, *Tylose*<sup>®</sup> and *Klucel G*<sup>®</sup>

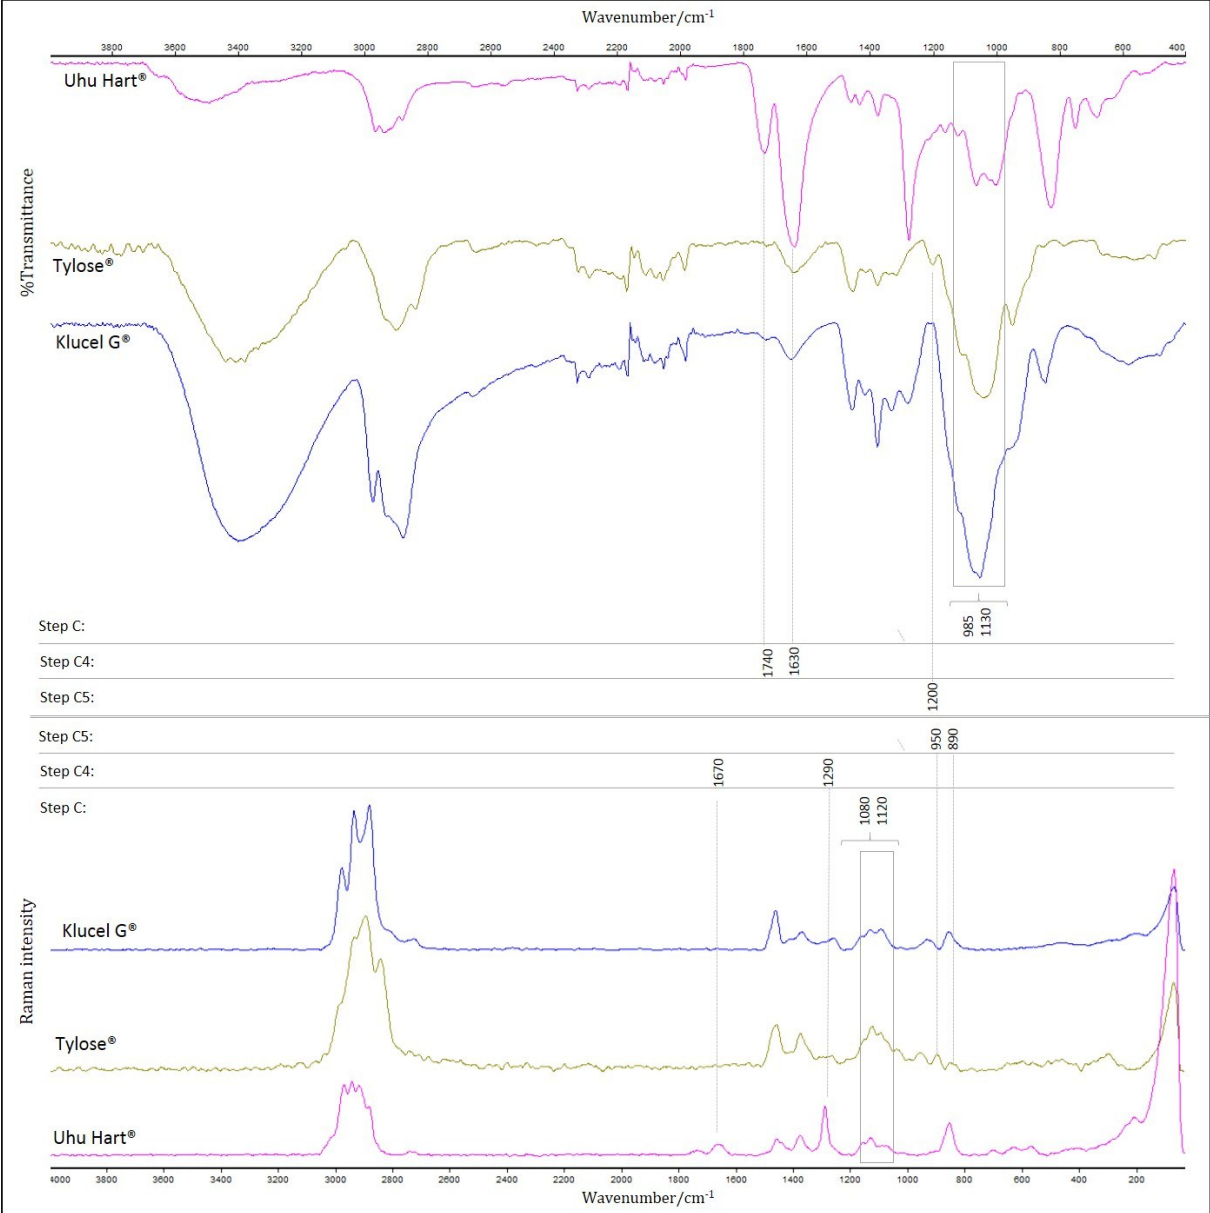

Supplement: c6ay02645a1.pdf [file c6ay02645a1.pdf]
